# Supplementary material for: Mixed Fibrinolytic Phenotypes in Decompensated Cirrhosis and Acute‐on‐Chronic Liver Failure with Hypofibrinolysis in Those With Complications and Poor Survival
Source: PubMed Central journal article supplement — Hepatology. 2019 Oct 24;71(4):1381–90. doi: 10.1002/hep.30915 (PMC7187291; doi:10.1002/hep.30915), 2019-10-24
Supplement: HEP-71-1381-s001.pdf [file HEP-71-1381-s001.pdf]

## King's College Hospital, London

## Hospital Clinic, Barcelona

Potentially  
eligible n=250

Screened for  
eligibility  
n=87

Excluded n=45

- Did not meet inclusion criteria n=36
- Declined to participate n=4
- Other n=5

Included and  
analysed n=42  
(30 AD, 12  
ACLF)

Potentially  
eligible n=270

Screened for  
eligibility  
n=136

Excluded n=69

- Did not meet inclusion criteria n=67
- Declined to participate n=2

Included and  
analysed n=67  
(22 AD, 45  
ACLF)

Supplemental figure 1 – STROBE diagram outlining inclusion of patients at the two inclusion sites

STROBE: STrengthening the Reporting of OBservational studies in Epidemiology
